# Supplementary material for: Euglena extract suppresses adipocyte-differentiation in human adipose-derived stem cells
Source: PubMed Central journal article supplement (PMC5813920; doi:10.1371/journal.pone.0192404), 2018-02-15
Supplement: pone.0192404.s002.pdf [file pone.0192404.s002.pdf]

S1 Table. Primers used in quantitative RT-qPCR for S3 Fig.

| Primers |         | Sequence (direction: 5' to 3') |
|---------|---------|--------------------------------|
| LPL     | Forward | TCTTCTCGTTGGCAGGGTTG           |
|         | Reverse | CTTCCCTTGAGGAGGAGGA            |
| aP2     | Forward | TTAGATGGGGGTGTCCTGGT           |
|         | Reverse | GGTCAACGTCCTTGGCTTA            |
